# Supplementary material for: Chemical Composition of Essential Oils from Natural Populations of Artemisia scoparia Collected at Different Altitudes: Antibacterial, Mosquito Repellent, and Larvicidal Effects
Source: MDPI journal article supplement (doi:10.3390/molecules29061359), 2024-03-19
Supplement: s1 [file s1]

*Supplementary Material to the manuscript*

Amna Parveen, Muhammad Ghazanfar Abbas, Ken Keefover-Ring, Muhammad Binyameen, Raimondas Mozūratīs, and Muhammad Azeem

**Chemical composition of essential oils from natural population of *Artemisia scoparia* collected at different altitudes: antibacterial, mosquito repellent, and larvicidal effects**

**Table S1a** Relative median potency estimates of *A. scoparia* essential oils tested for mosquito larvicidal activity after 24 h exposure time

| Baseline essential oil | Essential oils for comparison | Relative median potency ratio $\bar{\pi}$ | Confidence Limits |             |
|------------------------|-------------------------------|-------------------------------------------|-------------------|-------------|
|                        |                               |                                           | Lower Bound       | Upper Bound |
| Asco-1                 | Asco-2                        | 1.625                                     | .816              | 3.616       |
|                        | Asco-3*                       | .476                                      | .201              | .941        |
|                        | Asco-4                        | 1.448                                     | .730              | 3.126       |
|                        | Asco-5*                       | 2.465                                     | 1.291             | 5.810       |
| Asco-2                 | Asco-1                        | .615                                      | .277              | 1.225       |
|                        | Asco-3*                       | .293                                      | .100              | .642        |
|                        | Asco-4                        | .891                                      | .420              | 1.839       |
|                        | Asco-5                        | 1.517                                     | .809              | 3.141       |
| Asco-3                 | Asco-2*                       | 3.414                                     | 1.558             | 10.011      |
|                        | Asco-1*                       | 2.100                                     | 1.063             | 4.972       |
|                        | Asco-4*                       | 3.042                                     | 1.421             | 8.485       |
|                        | Asco-5*                       | 5.177                                     | 2.279             | 17.389      |
| Asco-4                 | Asco-2                        | 1.122                                     | .544              | 2.378       |
|                        | Asco-1                        | .690                                      | .320              | 1.370       |
|                        | Asco-3*                       | .329                                      | .118              | .704        |
|                        | Asco-5                        | 1.702                                     | .904              | 3.635       |
| Asco-5                 | Asco-2                        | .659                                      | .318              | 1.236       |
|                        | Asco-1*                       | .406                                      | .172              | .775        |
|                        | Asco-3*                       | .193                                      | .058              | .439        |
|                        | Asco-4                        | .588                                      | .275              | 1.106       |

**Table S1b** Relative median potency estimates of *A. scoparia* essential oils tested for mosquito larvicidal activity after 48 h exposure time

| Baseline essential oil | Essential oils for comparison | Relative median potency ratio<br>$\bar{T}$ | Confidence Limits |             |
|------------------------|-------------------------------|--------------------------------------------|-------------------|-------------|
|                        |                               |                                            | Lower Bound       | Upper Bound |
| Asco-1                 | Asco-2                        | 1.479                                      | .766              | 3.154       |
|                        | Asco-3*                       | .439                                       | .178              | .867        |
|                        | Asco-4                        | 1.057                                      | .535              | 2.111       |
|                        | Asco-5*                       | 1.975                                      | 1.082             | 4.295       |
| Asco-2                 | Asco-1                        | .676                                       | .317              | 1.305       |
|                        | Asco-3*                       | .297                                       | .100              | .637        |
|                        | Asco-4                        | .714                                       | .332              | 1.408       |
|                        | Asco-5                        | 1.335                                      | .737              | 2.609       |
| Asco-3                 | Asco-2*                       | 3.372                                      | 1.569             | 9.957       |
|                        | Asco-1*                       | 2.279                                      | 1.154             | 5.604       |
|                        | Asco-4*                       | 2.409                                      | 1.189             | 6.145       |
|                        | Asco-5*                       | 4.501                                      | 2.060             | 14.585      |
| Asco-4                 | Asco-2                        | 1.400                                      | .710              | 3.011       |
|                        | Asco-1                        | .946                                       | .474              | 1.868       |
|                        | Asco-3*                       | .415                                       | .163              | .841        |
|                        | Asco-5*                       | 1.868                                      | 1.007             | 4.082       |
| Asco-5                 | Asco-2                        | .749                                       | .383              | 1.357       |
|                        | Asco-1*                       | .506                                       | .233              | .924        |
|                        | Asco-3*                       | .222                                       | .069              | .485        |
|                        | Asco-4*                       | .535                                       | .245              | .993        |

\* indicate essential oils possessed significantly higher or lower toxicity in comparison to the baseline essential oil in a table. The LC<sub>50</sub> estimates for tested essential oil are significantly different ( $P < 0.05$ ) from the baseline essential oil if confidence limits for relative median potency ratios do not overlap with the value 1.

$\bar{T}$  Relative median potency ratio values  $> 1$  indicate that the compared essential oils are more toxic than their respective baseline essential oil. Relative median potency ratio values  $< 1$  indicate compared essential oils are less toxic than their respective baseline essential oil.
